# Supplementary material
Source: publisher site journal article supplement (https://www.dovepress.com/article/531689)
Supplement: Supplementary file 1 [file Supplementary%20Material_1.docx]

**Supplementary material**


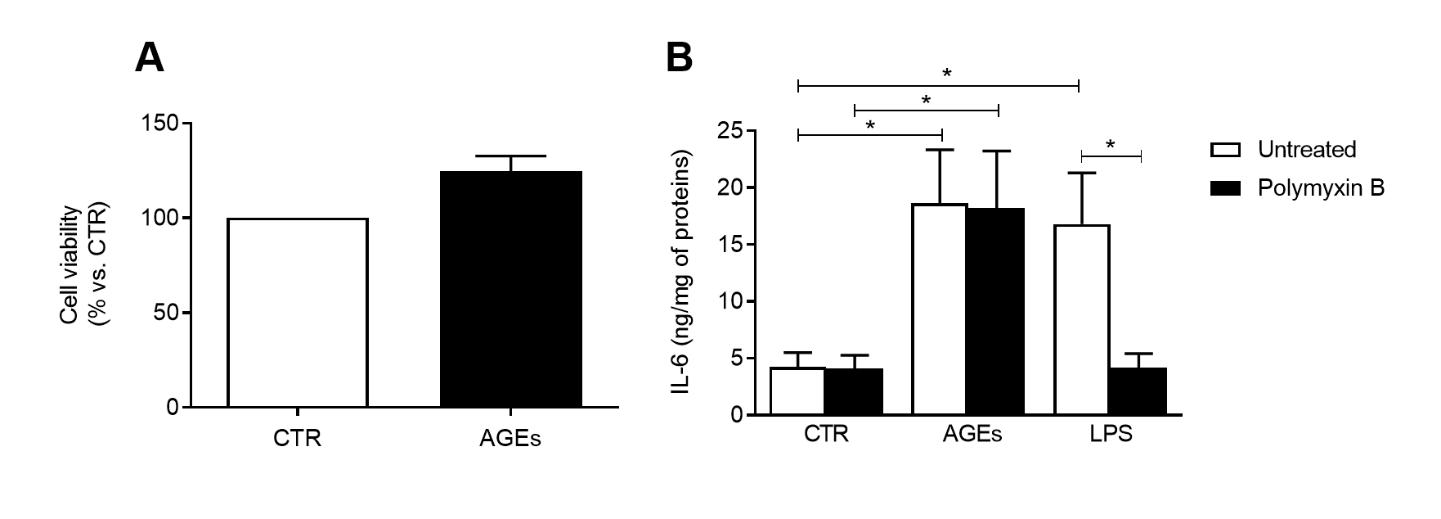


**Supplementary Figure 1** (A) Comparison of cell viability of HLMs treated 16 hours with medium alone (CTR) or AGEs by the MTT assay. Cell survival data are presented in the form of a bar graph (B) Effect of polymyxin B on AGEs and LPS-induced release of IL-6 from HLMs. HLMs were incubated (16 hrs, 37 °C, 5% CO2,) with medium alone (CTR), AGEs (100 µg/mL), or LPS (1 µg/mL) either in the absence or in the presence of polymyxin B (50 µg/mL). Data are the mean ± SD of 3 experiments obtained from different donors. IL-6 (B) proteins in supernatants were evaluated by ELISA. * *p* <0.05 *vs*. all other groups.


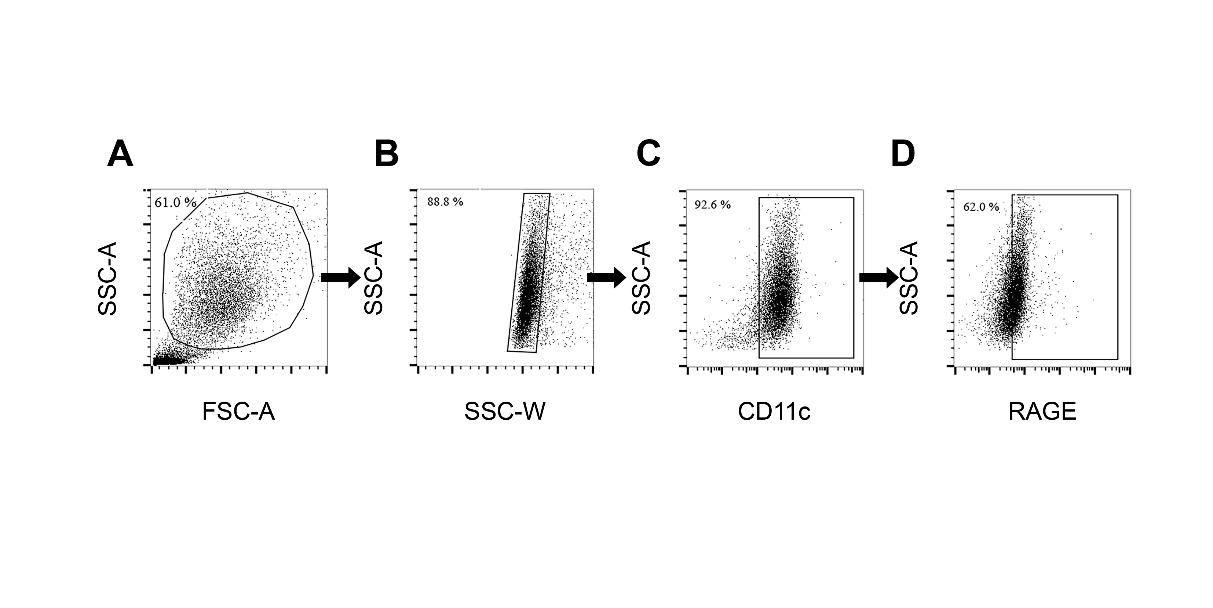


**Supplementary Figure 2** Flow cytometry gating strategy used to define RAGE⁺ HLMs in the human lung. (A) Granulocytes were gated based on SSC-A versus FSC-A. (B) Singlets were selected from the SSC-A versus FSC-W dot plot. (C) Macrophages were identified by CD11c expression. (D) RAGE⁺ cells were then defined using RAGE antibody staining.
